# Supplementary material for: Simultaneous Discovery, Estimation and Prediction Analysis of Complex Traits Using a Bayesian Mixture Model
Source: PLOS journal article supplement (doi:10.1371/journal.pgen.1004969), 2015-04-07
Supplement: S3 (10.1371/journal.pgen.1004969.s003) [file journal.pgen.1004969.s003]

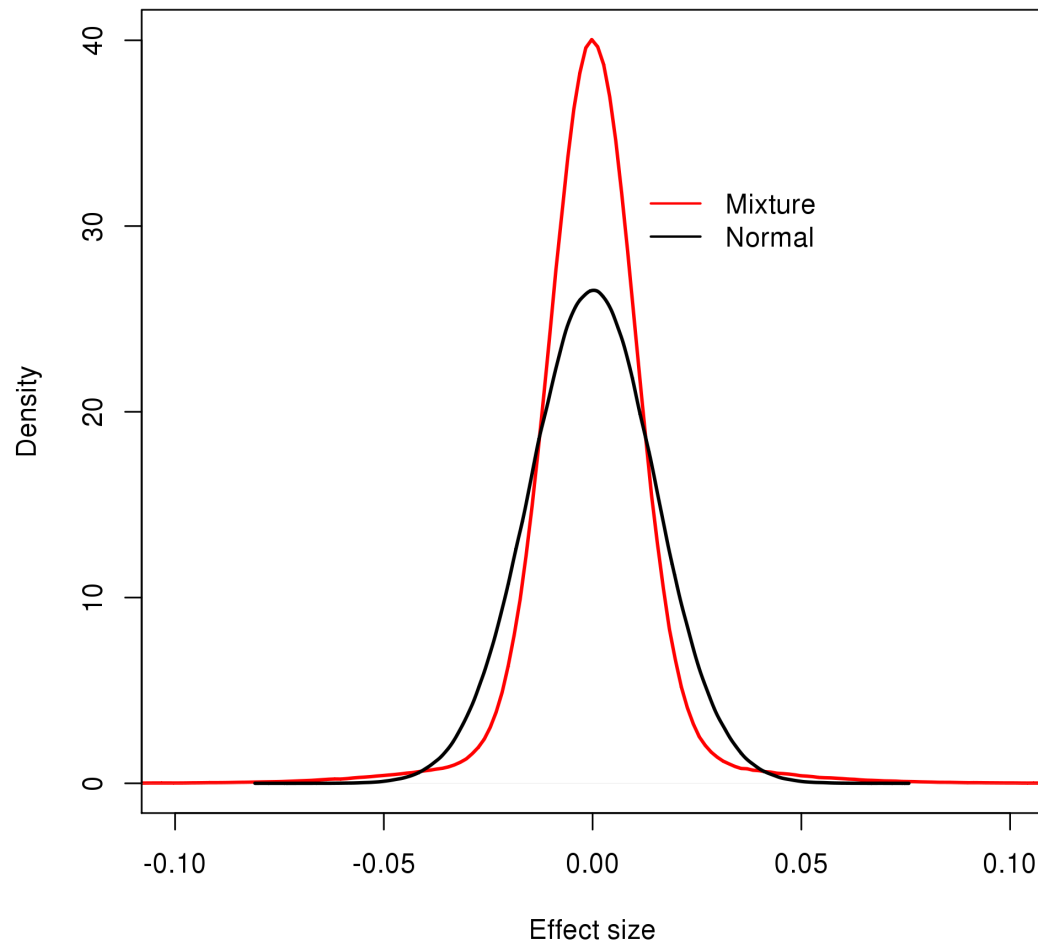

**Figure S1. Probability density function of the mixture distribution (red) used to sample SNP effects and probability density function of a normal distribution with the same mean and variance (black).**
